# Supplementary material
Source: Springer Nature journal article supplement (https://www.springermedizin.de/resource/supplementary/12913_2013_3423_MOESM5_ESM.pdf/9532770)
Supplement: MOESM5 [file 9532770]

Form expert group

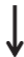

Present evidence dossier—review, qualitative data, quantitative ‘effectiveness’ data, and cost data

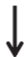

Discuss each type of evidence in series

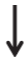

Discuss implications for effectiveness estimates

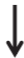

Elicit Probability Densities individually

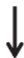

Break (Pool densities)

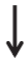

Further discussion

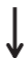

Final probability elicitation

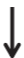

Final mathematical pooling

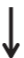

Formal description of elicitation process  
from review of recording
